# Supplementary material for: One water to bind a chloride-chloride ion pair: isolation of discrete [Cl2(H2O)]2− in the solid state
Source: Royal Society of Chemistry journal article supplement (doi:10.1039/d0dt02300k), 2020-01-01
Supplement: d0dt02300k1.pdf [file d0dt02300k1.pdf]

## Supplementary Material

### Contents

#### Experimental

General considerations

Synthesis of bis(bis(2,2,2-trifluoroethyl)amino)dihexylaminocyclopropenium chloride semihydrate,  $[\text{C}_3(\text{NHex}_2)(\text{NC}_2\text{H}_4\text{F}_6)_2]\text{Cl}\cdot 0.5\text{H}_2\text{O}$

X-ray crystallography

**Table 1S.** Structure refinement data for  $[\text{C}_3(\text{NHex}_2)(\text{N}(\text{CH}_2\text{CF}_3)_2)_2]\text{Cl}\cdot 0.5\text{H}_2\text{O}$ .

**Figure 1S.** Numbering scheme for the two independent cations in  $[\text{C}_3(\text{NHex}_2)(\text{N}(\text{CH}_2\text{CF}_3)_2)_2]\text{Cl}\cdot 0.5\text{H}_2\text{O} \cdot 5\text{H}_2\text{O}$  (H atoms removed for clarity).

**Table 2S.** Bond distances for  $[\text{C}_3(\text{NHex}_2)(\text{N}(\text{CH}_2\text{CF}_3)_2)_2]\text{Cl}\cdot 0.5\text{H}_2\text{O}$ .

**Table 3S.** Selected bond angles for  $[\text{C}_3(\text{NHex}_2)(\text{N}(\text{CH}_2\text{CF}_3)_2)_2]\text{Cl}\cdot 0.5\text{H}_2\text{O}$ .

**Table 4S.** Hydrogen-bonding parameters for the dichloride-water cluster environment.

**Figure 2S.** Infrared spectra of  $[\text{C}_3(\text{NHex}_2)(\text{N}(\text{CH}_2\text{CF}_3)_2)_2]\text{Cl}\cdot 0.5\text{H}_2\text{O}$  and the HDO and D<sub>2</sub>O isotopomers.

**Figure 3S.** <sup>1</sup>H-NMR spectrum of  $[\text{C}_3(\text{NHex}_2)(\text{NC}_2\text{H}_4\text{F}_6)_2]\text{Cl}\cdot 0.5\text{H}_2\text{O}$  in CD<sub>3</sub>OD.

**Figure 4S.** <sup>13</sup>C{<sup>1</sup>H}-NMR spectrum of  $[\text{C}_3(\text{NHex}_2)(\text{NC}_2\text{H}_4\text{F}_6)_2]\text{Cl}\cdot 0.5\text{H}_2\text{O}$  in CD<sub>3</sub>OD.

**Figure 5S.** <sup>19</sup>F-NMR spectrum of  $[\text{C}_3(\text{NHex}_2)(\text{NC}_2\text{H}_4\text{F}_6)_2]\text{Cl}\cdot 0.5\text{H}_2\text{O}$  in CD<sub>3</sub>OD.

#### References

#### EXPERIMENTAL

##### General considerations

All the experimental work and sample preparation were carried out under dried nitrogen atmosphere using standard Schlenk techniques. CH<sub>2</sub>Cl<sub>2</sub>, C<sub>3</sub>Cl<sub>5</sub>H, diethylether, petroleum ether, methanol, ethanol, D<sub>2</sub>O, trihexylamine, and NH(CH<sub>2</sub>CF<sub>3</sub>)<sub>2</sub> were obtained commercially. CH<sub>2</sub>Cl<sub>2</sub> was dried using an in-house solvent purification system. Mid-IR data were collected at room temperature by using a Bruker Alpha spectrometer, operating with a Platinum ATR unit with a diamond crystal. A resolution of 4 cm<sup>-1</sup> and 25 scans were taken. <sup>1</sup>H-, <sup>13</sup>C{<sup>1</sup>H}- and <sup>19</sup>F-NMR spectra were collected on a JEOL ECZ400S spectrometer operating at 400, 100 and 376 MHz, respectively, in CD<sub>3</sub>OD referenced to residual solvent peaks. The instrument was equipped with a ROYAL HFX probe. Electrospray mass spectrometry was carried out on a Micromass LCT, with samples dissolved in acetonitrile. Microanalyses were performed by Campbell Microanalytical Laboratory, University of Otago, Dunedin.

##### Synthesis of bis(bis(2,2,2-trifluoroethyl)amino)dihexylaminocyclopropenium chloride semihydrate,

**$[\text{C}_3(\text{NHex}_2)(\text{NC}_2\text{H}_4\text{F}_6)_2]\text{Cl}\cdot 0.5\text{H}_2\text{O}$ .** NHex<sub>3</sub> (5.056 g, 18.02 mmol) and NH(CH<sub>2</sub>CF<sub>3</sub>)<sub>2</sub> (8.456 g, 44.61 mmol) were dissolved in dried CH<sub>2</sub>Cl<sub>2</sub> (10 mL) and added slowly to C<sub>3</sub>Cl<sub>5</sub>H (2.290 g, 10.69 mmol) which was dissolved in dried CH<sub>2</sub>Cl<sub>2</sub> (30 mL) at 0 °C with stirring. The stirring was continued at ambient temperature for 48 h. CH<sub>2</sub>Cl<sub>2</sub> was removed *in vacuo* and column chromatographic separation through silica gel column gave a white powder (0.63 g, 10% yield). A mixture of petroleum ether, CH<sub>2</sub>Cl<sub>2</sub> and ethanol (4:3:1 ratio) was used as eluent. Crystals suitable for X-ray diffraction were grown by slow evaporation of an undried methanol-diethyl ether solution. <sup>1</sup>H NMR (CD<sub>3</sub>OD, 400 MHz): 4.47 (q, <sup>3</sup>J<sub>HF</sub> = 8.1 Hz, 8H, NCH<sub>2</sub>CF<sub>3</sub>), 3.52 (t, <sup>3</sup>J<sub>HH</sub> = 7.4 Hz, 4H, NCH<sub>2</sub>), 1.70 (m, 4H, NCH<sub>2</sub>CH<sub>2</sub>CH<sub>2</sub>), 1.34 (m, 12H, NCH<sub>2</sub>CH<sub>2</sub>(CH<sub>2</sub>)<sub>3</sub>CH<sub>3</sub>), 0.93 (t, <sup>3</sup>J<sub>HH</sub> = 6.7 Hz, 6H, CH<sub>3</sub>). <sup>13</sup>C{<sup>1</sup>H} NMR (CD<sub>3</sub>OD, 100 MHz): 125.51 (q, <sup>1</sup>J<sub>CF</sub> = 280.3 Hz, NCH<sub>2</sub>CF<sub>3</sub>), 124.67

( $\underline{\text{C}}\text{N}(\text{CH}_2\text{CF}_3)_2$ ), 119.25 ( $\underline{\text{C}}\text{NHex}_2$ ), 55.80 (q,  $^2J_{\text{CF}} = 34.4$  Hz,  $\underline{\text{N}}\text{CH}_2\text{CF}_3$ ), 54.64 ( $\underline{\text{N}}\text{CH}_2$ ), 32.73 ( $\underline{\text{N}}\text{CH}_2\underline{\text{C}}\text{H}_2$ ), 29.08 ( $\underline{\text{N}}\text{CH}_2\text{CH}_2\underline{\text{C}}\text{H}_2$ ), 27.16 ( $\underline{\text{N}}\text{CH}_2\text{CH}_2\text{CH}_2\underline{\text{C}}\text{H}_2$ ), 23.73 ( $\underline{\text{N}}\text{CH}_2\text{CH}_2\text{CH}_2\text{CH}_2\underline{\text{C}}\text{H}_2$ ), 14.36 ( $\underline{\text{C}}\text{H}_3$ ).  $^{19}\text{F}$  NMR ( $\text{CD}_3\text{OD}$ , 376 MHz):  $-72.80$  (t,  $^3J_{\text{FH}} = 8.1$  Hz). ES-MS $^+$   $m/z$  580.2573 (100%,  $\text{M}^+$ ); calculated for  $\text{C}_{23}\text{H}_{34}\text{F}_{12}\text{N}_3^+$  580.2556. Microanalysis: Exptl C, 43.91; H, 5.64; N, 6.45. Calcd for  $\text{C}_{23}\text{H}_{35}\text{ClF}_{12}\text{N}_3\text{O}_{0.5}$  C, 44.20; H, 5.64; 6.72.

## X-ray Crystallography

A suitable crystal was mounted on a SuperNova, Dual, Cu at home/near, Atlas diffractometer. Using Olex2,<sup>[1]</sup> the structure was solved with the XS structure solution program<sup>[2]</sup> using Direct Methods and refined with the XL refinement package<sup>[2]</sup> using Least Squares minimisation with anisotropic thermal parameters for all non-hydrogen atoms. Hydrogen atoms on the methylene groups were refined isotropically at their calculated positions and methyl groups were refined as rotating groups. The water protons were located from the density difference map and refined isotropically. CCDC 1988268 contains the supplementary crystallographic data for this paper. This data can be obtained free of charge from The Cambridge Crystallographic Data Centre via [www.ccdc.cam.ac.uk/data\\_request/cif](http://www.ccdc.cam.ac.uk/data_request/cif).

**Table 1S.** Structure refinement data for  $[\text{C}_3(\text{NHex}_2)(\text{N}(\text{CH}_2\text{CF}_3)_2)_2]\text{Cl}\cdot 0.5\text{H}_2\text{O}$ .

| Parameter                            | Value                                                                  | Parameter                                    | Value                |
|--------------------------------------|------------------------------------------------------------------------|----------------------------------------------|----------------------|
| formula                              | $\text{C}_{46}\text{H}_{70}\text{Cl}_2\text{F}_{24}\text{N}_6\text{O}$ | $T$ [K]                                      | 119.99(10)           |
| $a$ [Å]                              | 10.6228(4)                                                             | $F(000)$                                     | 2584                 |
| $b$ [Å]                              | 38.0161(17)                                                            | $2\theta$ range [°]                          | 7.498–142.998        |
| $c$ [Å]                              | 15.0865(5)                                                             | index ranges                                 | $-12 \leq h \leq 13$ |
| $\alpha$ [°]                         | 90                                                                     |                                              | $-33 \leq k \leq 46$ |
| $\beta$ [°]                          | 94.999(3)                                                              |                                              | $-18 \leq l \leq 18$ |
| $\gamma$ [°]                         | 90                                                                     | reflections collected                        | 26625                |
| $V$ [Å $^3$ ]                        | 6069.3(4)                                                              | independent reflns                           | 11795                |
| $Z$                                  | 4                                                                      | $R(\text{int})$                              | 0.0783               |
| $\rho_{\text{calc}}$ [g cm $^{-3}$ ] | 1.368                                                                  | data/restraints/parameters                   | 11795/7/749          |
| crystal system                       | monoclinic                                                             | GoF on $F^2$                                 | 1.002                |
| space group                          | P21/n                                                                  | $R_1/wR_2$ [ $I > 2\sigma(I)$ ]              | 0.0699/0.1618        |
| shape/colour                         | plate/colourless                                                       | $R_1/wR_2$ (all data)                        | 0.1335/0.1879        |
| crystal size [mm]                    | 0.234 × 0.123 × 0.025                                                  | $\Delta\rho_{\text{max/min}}/e$ [Å $^{-3}$ ] | 0.525/−0.337         |
| $\mu$ [mm $^{-1}$ ]                  | 1.974                                                                  | CCDC number                                  | 1988268              |

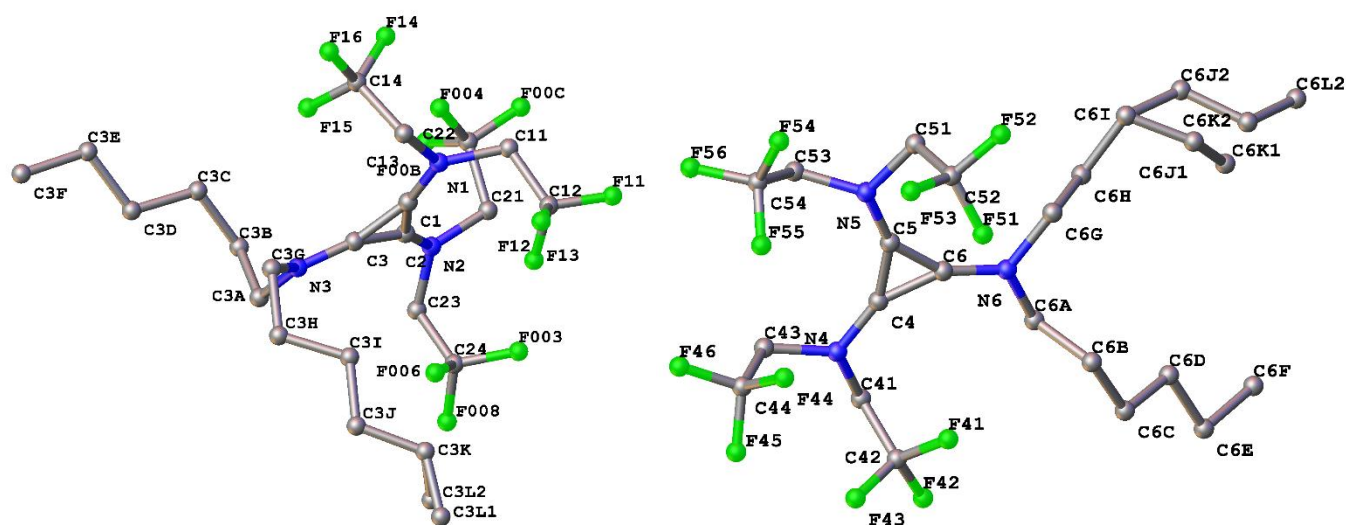

**Figure 1S.** Numbering scheme for the two independent cations in  $[\text{C}_3(\text{NHex}_2)(\text{N}(\text{CH}_2\text{CF}_3)_2)_2]\text{Cl}\cdot 0.5\text{H}_2\text{O}$  (H atoms removed for clarity).

**Table 2S.** Bond distances (Å) for [C<sub>3</sub>(NHex<sub>2</sub>)(N(CH<sub>2</sub>CF<sub>3</sub>)<sub>2</sub>)<sub>2</sub>]Cl·0.5H<sub>2</sub>O.

|          |           |           |           |
|----------|-----------|-----------|-----------|
| O1–H1A   | 0.79(16)  | O1–H1B    | 0.85(2)   |
| C1–C2    | 1.372(5)  | C5–C4     | 1.357(6)  |
| C1–C3    | 1.394(5)  | C6–C4     | 1.393(6)  |
| C3–C2    | 1.388(5)  | C5–C6     | 1.367(6)  |
| N1–C1    | 1.338(5)  | N4–C4     | 1.346(5)  |
| N1–C11   | 1.468(5)  | N4–C41    | 1.451(6)  |
| N1–C13   | 1.465(4)  | N4–C43    | 1.454(6)  |
| N2–C2    | 1.347(5)  | N5–C5     | 1.362(5)  |
| N2–C21   | 1.450(4)  | N5–C51    | 1.459(5)  |
| N2–C23   | 1.463(5)  | N5–C53    | 1.461(6)  |
| N3–C3    | 1.305(5)  | N6–C6     | 1.309(6)  |
| N3–C3A   | 1.477(5)  | N6–C6G    | 1.478(6)  |
| N3–C3G   | 1.473(5)  | N6–C6A    | 1.468(6)  |
| C11–C12  | 1.489(7)  | C41–C42   | 1.492(7)  |
| F11–C12  | 1.326(6)  | F41–C42   | 1.351(6)  |
| F12–C12  | 1.329(7)  | F42–C42   | 1.319(6)  |
| F13–C12  | 1.353(5)  | F43–C42   | 1.345(7)  |
| C13–C14  | 1.507(6)  | C43–C44   | 1.491(8)  |
| F14–C14  | 1.340(5)  | F44–C44   | 1.310(7)  |
| F15–C14  | 1.343(5)  | F45–C44   | 1.303(7)  |
| F16–C14  | 1.343(4)  | F46–C44   | 1.342(7)  |
| C21–C22  | 1.518(6)  | C51–C52   | 1.500(7)  |
| F004–C22 | 1.339(4)  | F51–C52   | 1.338(5)  |
| F00B–C22 | 1.327(5)  | F52–C52   | 1.336(5)  |
| F00C–C22 | 1.339(4)  | F53–C52   | 1.331(6)  |
| C23–C24  | 1.501(6)  | C53–C54   | 1.489(7)  |
| F003–C24 | 1.338(5)  | F54–C54   | 1.325(6)  |
| F006–C24 | 1.349(5)  | F55–C54   | 1.316(6)  |
| F008–C24 | 1.339(5)  | F56–C54   | 1.352(6)  |
| C3A–C3B  | 1.521(7)  | C6A–C6B   | 1.524(8)  |
| C3B–C3C  | 1.509(7)  | C6B–C6C   | 1.543(8)  |
| C3C–C3D  | 1.469(8)  | C6C–C6D   | 1.487(8)  |
| C3D–C3E  | 1.543(9)  | C6D–C6E   | 1.542(12) |
| C3E–C3F  | 1.504(10) | C6E–C6F   | 1.603(13) |
| C3G–C3H  | 1.519(6)  | C6G–C6H   | 1.456(9)  |
| C3H–C3I  | 1.516(7)  | C6I–C6H   | 1.499(8)  |
| C3I–C3J  | 1.512(8)  | C6I–C6J1  | 1.42(2)   |
| C3J–C3K  | 1.498(10) | C6J1–C6K1 | 1.442(18) |
| C3K–C3L1 | 1.386(15) | C6K1–C6L1 | 1.521(19) |
| C3K–C3L2 | 1.389(17) | C6I–C6J2  | 1.508(13) |
|          |           | C6J2–C6K2 | 1.452(18) |
|          |           | C6L2–C6K2 | 1.545(19) |

**Table 3S.** Selected bond angles (°) for [C<sub>3</sub>(NHex<sub>2</sub>)(N(CH<sub>2</sub>CF<sub>3</sub>)<sub>2</sub>)<sub>2</sub>]Cl·0.5H<sub>2</sub>O.

|            |          |          |          |
|------------|----------|----------|----------|
| H1A–O1–H1B | 101(10)  | C5–C4–C6 | 59.6(3)  |
| C2–C1–C3   | 60.2(3)  | N4–C4–C5 | 151.5(4) |
| N1–C1–C2   | 150.2(3) | N4–C4–C6 | 148.9(4) |
| N1–C1–C3   | 149.6(3) | C4–C5–C6 | 61.5(3)  |
| C1–C2–C3   | 60.7(3)  | C4–C5–N5 | 149.4(4) |
| N2–C2–C1   | 150.7(4) | N5–C5–C6 | 149.1(4) |
| N2–C2–C3   | 148.6(4) | C5–C6–C4 | 58.9(3)  |
| C2–C3–C1   | 59.1(3)  | N6–C6–C4 | 150.8(4) |
| N3–C3–C1   | 152.2(4) | N6–C6–C5 | 150.2(4) |
| N3–C3–C2   | 148.7(4) |          |          |

|            |          |            |          |
|------------|----------|------------|----------|
| C1-N1-C13  | 120.7(3) | C4-N4-C41  | 119.4(4) |
| C1-N1-C11  | 120.1(3) | C4-N4-C43  | 119.4(4) |
| C13-N1-C11 | 119.2(3) | C41-N4-C43 | 119.0(4) |
| C2-N2-C21  | 120.4(3) | C5-N5-C51  | 118.2(4) |
| C2-N2-C23  | 118.1(3) | C5-N5-C53  | 120.2(4) |
| C21-N2-C23 | 118.4(3) | C51-N5-C53 | 118.0(3) |
| C3-N3-C3A  | 119.1(3) | C6-N6-C6G  | 121.0(4) |
| C3-N3-C3G  | 121.8(3) | C6-N6-C6A  | 121.9(4) |
| C3G-N3-C3A | 119.2(3) | C6A-N6-C6G | 116.9(4) |
| N1-C11-C12 | 110.2(3) | N4-C41-C42 | 112.0(4) |
| N1-C13-C14 | 109.8(4) | N4-C43-C44 | 114.6(5) |
| N2-C21-C22 | 110.3(3) | N5-C51-C52 | 110.1(4) |
| N2-C23-C24 | 110.6(3) | N5-C53-C54 | 112.8(4) |
| N3-C3A-C3B | 111.9(3) | N6-C6A-C6B | 111.7(4) |
| N3-C3G-C3H | 112.5(3) | N6-C6G-C6H | 114.7(5) |

**Table 4S.** Hydrogen-bonding parameters for the dichloride-water cluster environment.

| Hydrogen bond | Cl---C (Å) | Cl---H (Å) | Cl-H-C (°) |
|---------------|------------|------------|------------|
| Cl1-H13A-C13  | 3.444(4)   | 2.6038(10) | 145.0(2)   |
| Cl1-H21B-C21  | 3.640(4)   | 2.7677(10) | 150.0(3)   |
| Cl1-H23B-C23  | 3.432(4)   | 2.4994(10) | 161.3(2)   |
| Cl2-H11B-C11  | 3.612(4)   | 2.6925(10) | 158.5(2)   |
| Cl2-H13B-C13  | 3.509(4)   | 2.6069(10) | 154.7(3)   |
| Cl2-H41B-C41  | 3.543(5)   | 2.6037(10) | 163.2(3)   |
| Cl2-H53B-C53  | 3.659(4)   | 2.7368(10) | 159.2(3)   |

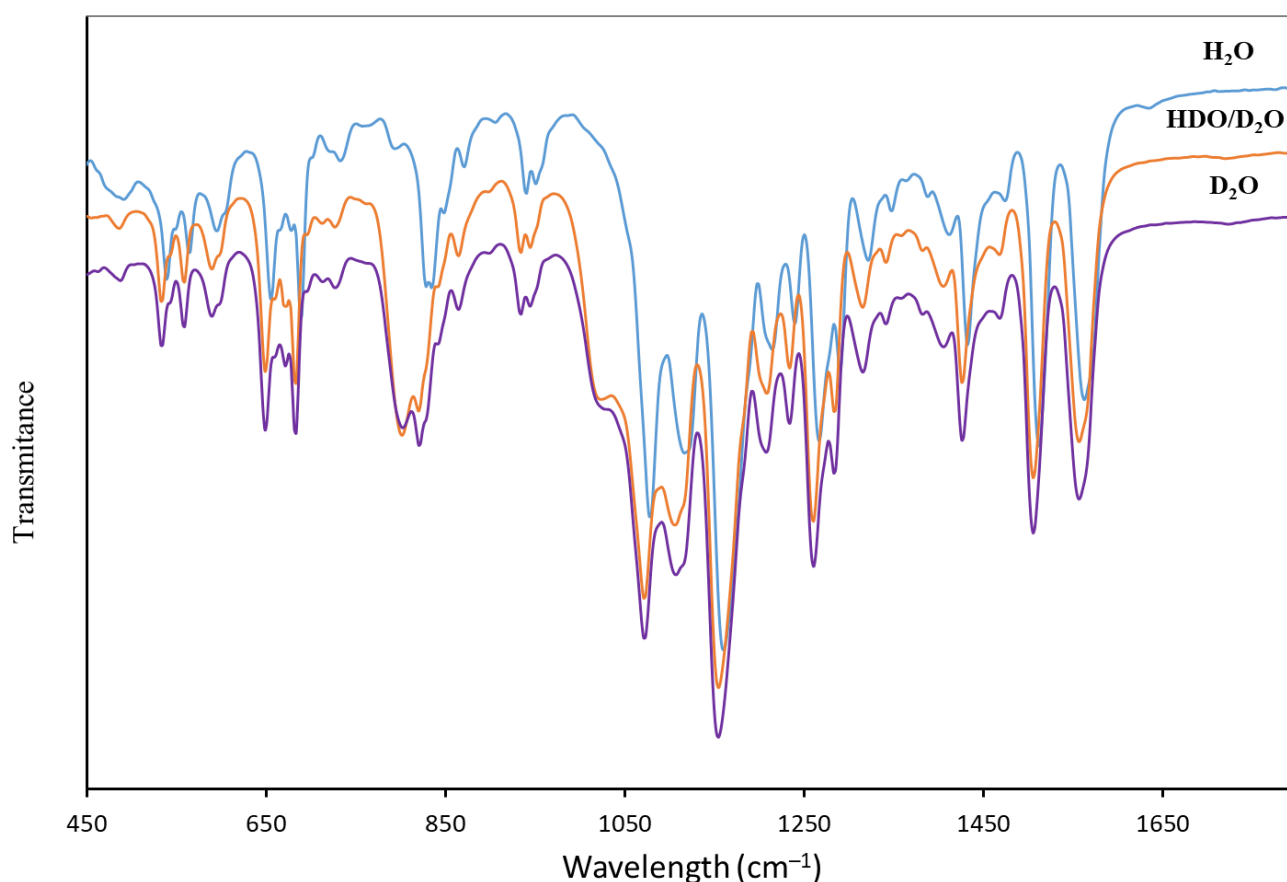

**Figure 2S.** Infrared spectra of  $[\text{C}_3(\text{NHex}_2)(\text{N}(\text{CH}_2\text{CF}_3)_2)_2]\text{Cl} \cdot 0.5\text{H}_2\text{O}$  and the HDO and  $\text{D}_2\text{O}$  isotopomers.

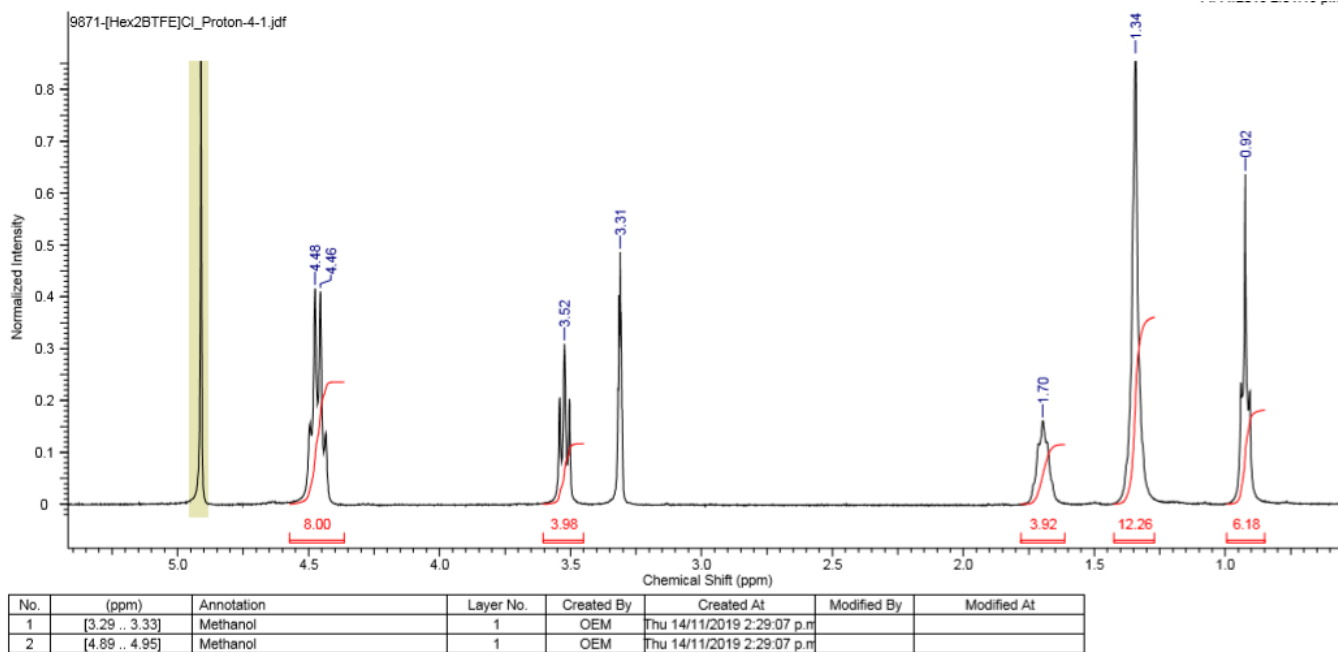

Figure 3S.  $^1\text{H}$ -NMR spectrum of  $[\text{C}_3(\text{NHex}_2)(\text{NC}_2\text{H}_4\text{F}_6)_2]\text{Cl}\cdot 0.5\text{H}_2\text{O}$  in  $\text{CD}_3\text{OD}$ .

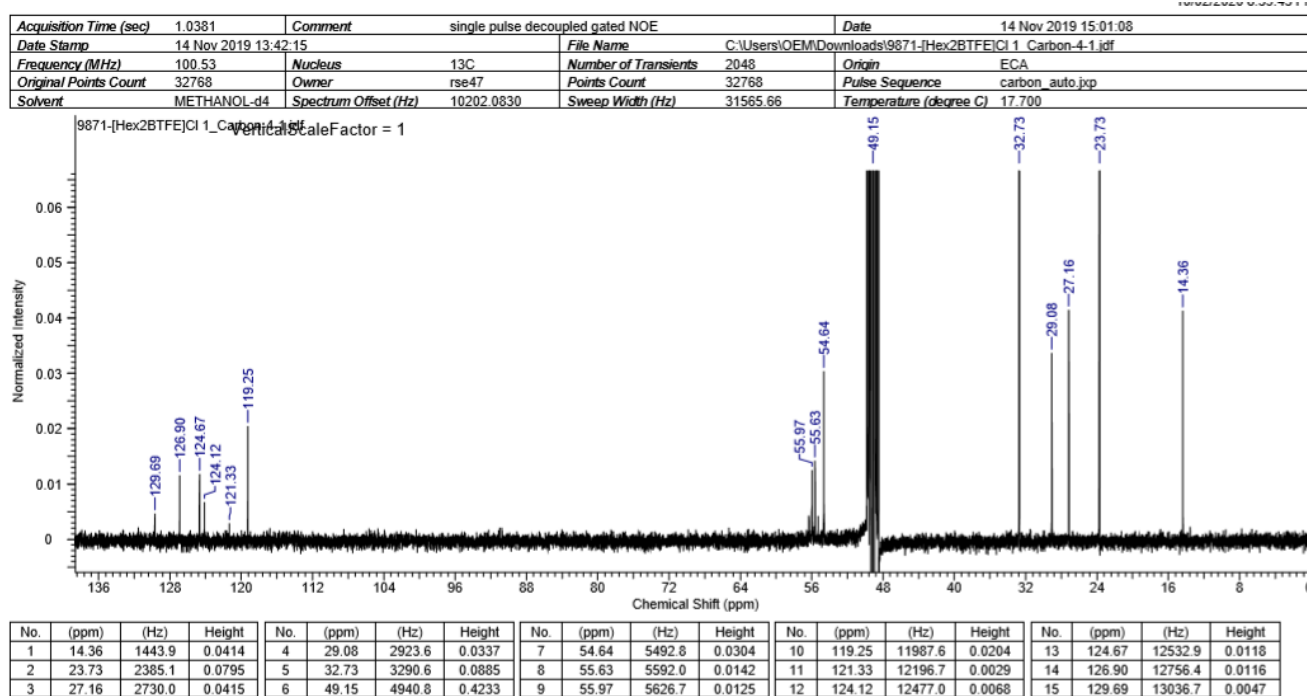

Figure 4S.  $^{13}\text{C}\{^1\text{H}\}$ -NMR spectrum of  $[\text{C}_3(\text{NHex}_2)(\text{NC}_2\text{H}_4\text{F}_6)_2]\text{Cl}\cdot 0.5\text{H}_2\text{O}$  in  $\text{CD}_3\text{OD}$ .

|                        |                      |                        |                                                           |                      |                      |
|------------------------|----------------------|------------------------|-----------------------------------------------------------|----------------------|----------------------|
| Acquisition Time (sec) | 0.3460               | Comment                | single_pulse                                              | Date                 | 14 Nov 2019 10:58:22 |
| Date Stamp             | 14 Nov 2019 10:51:14 | File Name              | C:\Users\OEM\Downloads\9871-[Hex2BTfE]Cl_Fluorine-2-1.jdf |                      |                      |
| Frequency (MHz)        | 376.17               | Nucleus                | 19F                                                       | Number of Transients | 128                  |
| Original Points Count  | 32768                | Owner                  | rse47                                                     | Points Count         | 32768                |
| Solvent                | METHANOL-d4          | Spectrum Offset (Hz)   | 0.0000                                                    | Pulse Sequence       | single_pulse.jxp     |
| Sweep Width (Hz)       | 94696.98             | Temperature (degree C) | 17.800                                                    | Spectrum Type        | STANDARD             |

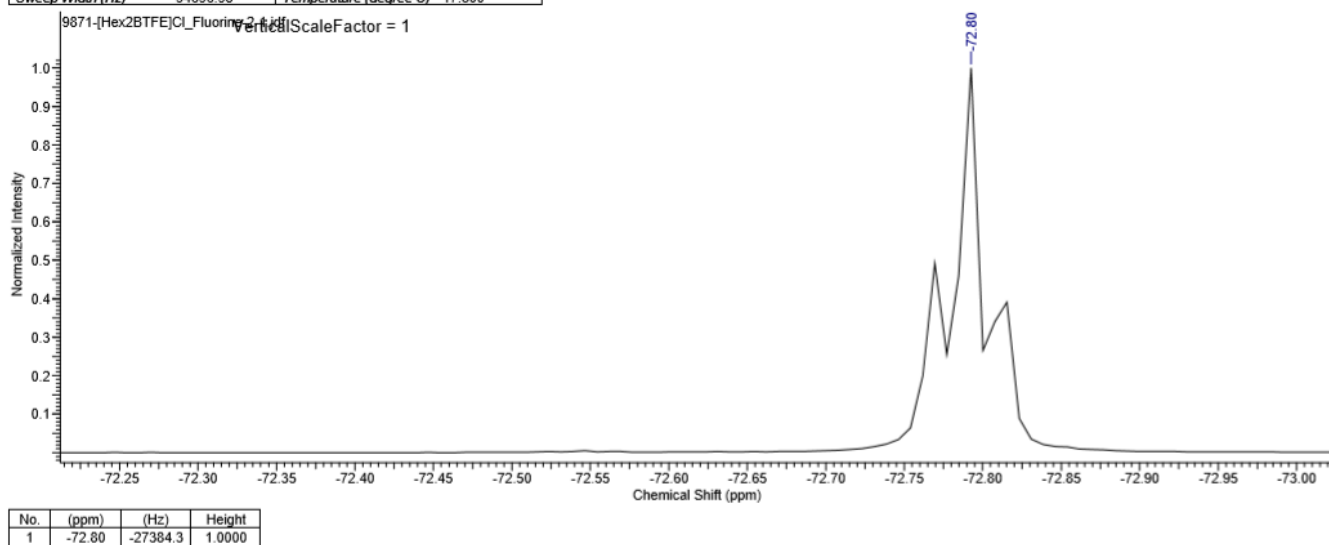

**Figure 5S.**  $^{19}\text{F}$ -NMR spectrum of  $[\text{C}_3(\text{NHex}_2)(\text{NC}_2\text{H}_4\text{F}_6)_2]\text{Cl}\cdot 0.5\text{H}_2\text{O}$  in  $\text{CD}_3\text{OD}$ .

## References

- [1] O. V. Dolomanov, L. J. Bourhis, R. J. Gildea, J. A. K. Howard, H. Puschmann, *J. Appl. Cryst.* **2009**, *42*, 339-341.
- [2] G. M. Sheldrick, *Acta Cryst.* **2008**, *A64*, 112-122.
